# Supplementary material
Source: publisher figshare collection journal article supplement (https://frontiersin.figshare.com/ndownloader/files/15082232)
Supplement: Supplementary file 1 [file 15082232]

**Table 1** Primer sequences

| <b>Gene name</b> | <b>Forward primer</b>    | <b>Reverse primer</b>   | <b>Expected product size bp</b> |
|------------------|--------------------------|-------------------------|---------------------------------|
| Ndufa1           | GGTGTCCACTGCGTACATCCAC   | CGCGTTCCATCAGATACCACTGG | 92                              |
| Ndufa9           | ACGTGATGCCGACCGACCTG     | GCCGTAGCACCTCAATGGACTTG | 87                              |
| Ndufs7           | CGCAGAGTTCATCAGAGTGTAGCC | CAGCCTTGGACACAGCAGACTG  | 91                              |
| Atp5f1           | GGCACAGCAGGCACTGGTTC     | TCCTTGCGACGCATCATGTTCTG | 171                             |
| GAPDH            | CGTGTTCTACCCCCAATGT      | TGTCATACTTGGCAGGTTT     | 104                             |
